# Supplementary material
Source: Springer Nature journal article supplement (https://www.springermedizin.de/resource/supplementary/12885_2011_2819_MOESM2_ESM.pdf/9461986)

A

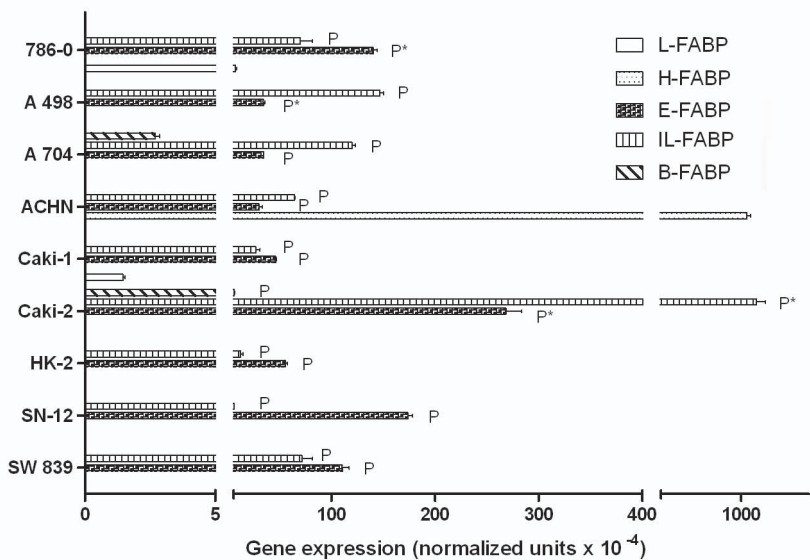

B

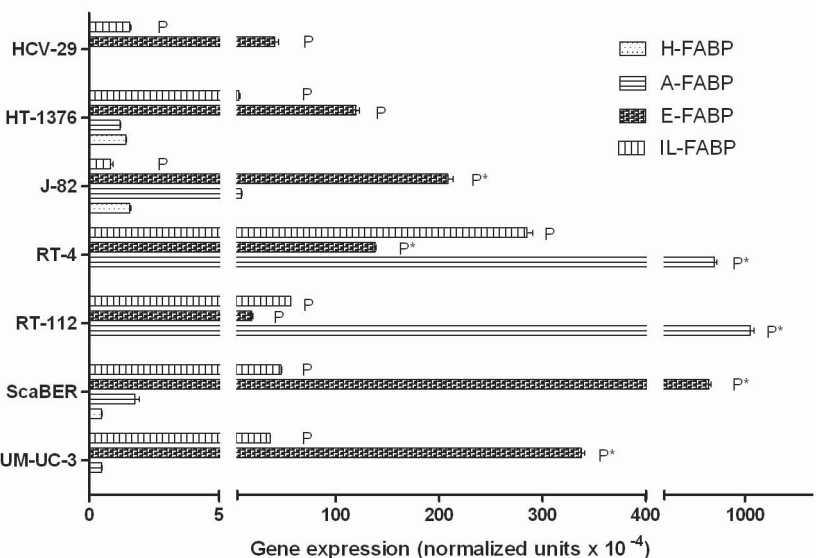

C

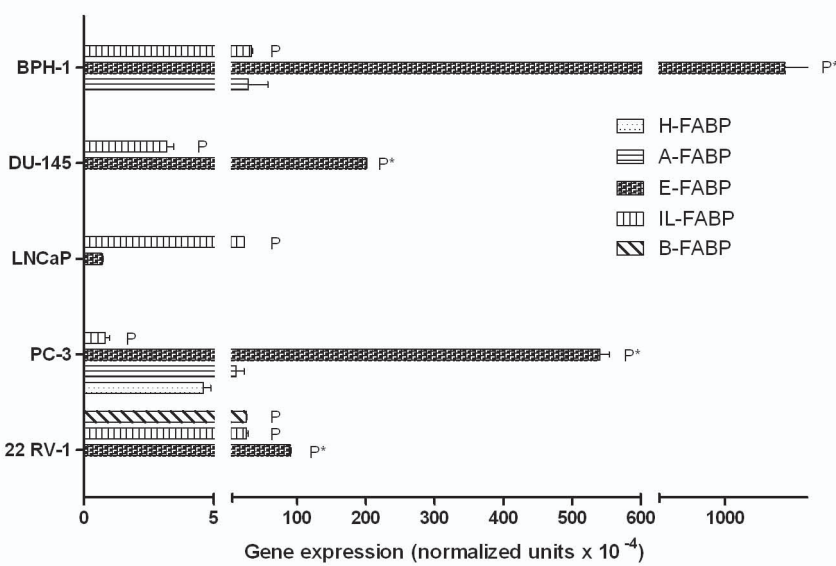

Supplement: MOESM2 [file 9461986]
